# Supplementary material for: An investigative study into an oscillatory reaction in acoustically levitated droplets
Source: Royal Society of Chemistry journal article supplement (doi:10.1039/d3ra06514f), 2023-01-01
Supplement: d3ra06514f3.pdf [file d3ra06514f3.pdf]

## An Investigative Study into an Oscillatory Reaction in Acoustically Levitated Droplets

*Ruamsiri Songsaeng<sup>1</sup>, Nicholas J. Goddard<sup>2</sup> and Ruchi Gupta<sup>\*,1</sup>*

<sup>1</sup> School of Chemistry, University of Birmingham, Birmingham, B15 2TT, UK

<sup>2</sup> Process Instruments, Turf Street, Burnley, Lancashire, BB11 3BP, UK

\*Corresponding author: [r.gupta.3@bham.ac.uk](mailto:r.gupta.3@bham.ac.uk)

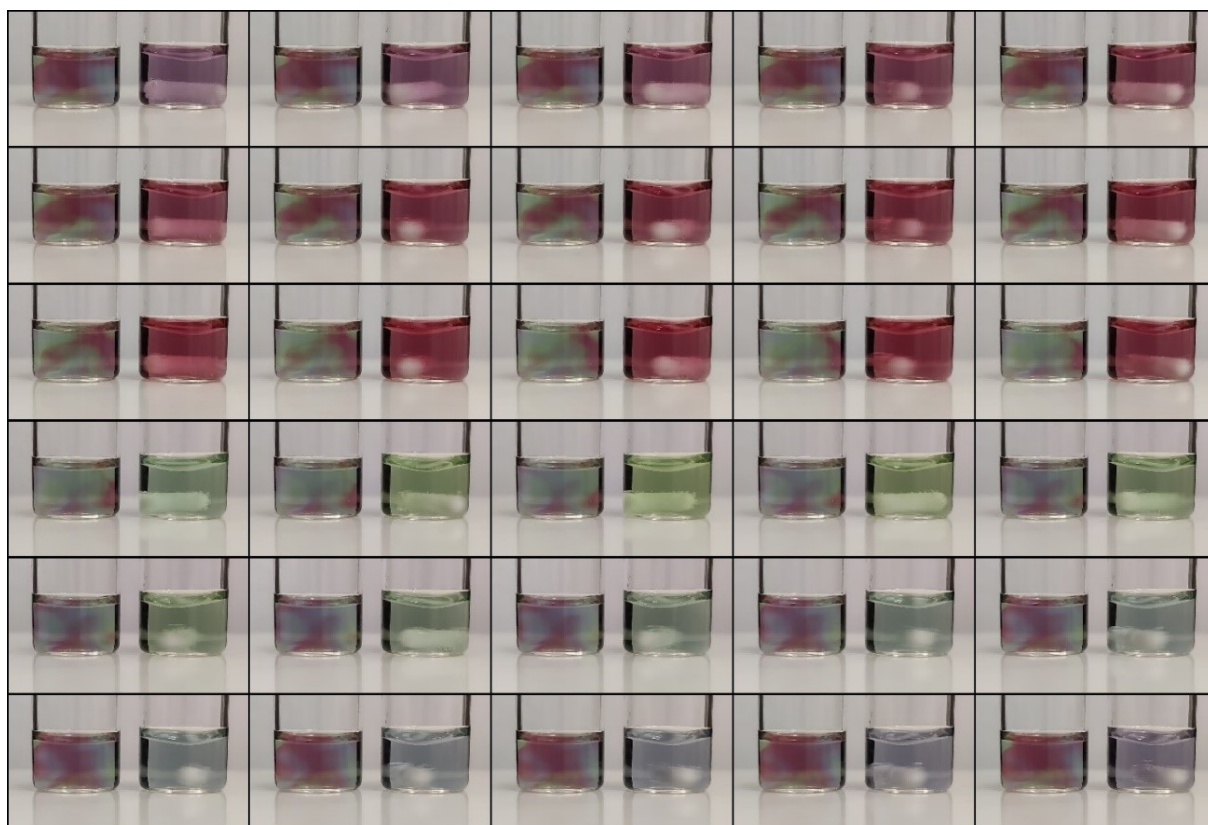

**Figure S1: Montage of images of the BZ chemical oscillator in unstirred (left) and stirred (right) vials with temporal resolution of 2 s (images should be read from top left to right and bottom and the diameter of the vial is ~25 mm)**
